# Supplementary material
Source: HighWire-hosted journal article supplement (https://erj.ersjournals.com/content/61/2/2200745)

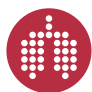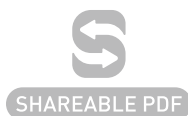

# Changes in cardiopulmonary exercise capacity and limitations 3–12 months after COVID-19

Charlotte Björk Ingul<sup>1,2,3</sup>, Anne Edvardsen<sup>1,4</sup>, Turid Follestad<sup>5</sup>, Divna Trebinjac<sup>1</sup>,  
Odd Andre Wathne Ankerstjerne<sup>1</sup>, Eivind Brønstad<sup>2,6</sup>, Øystein Rasch-Halvorsen<sup>2,6</sup>, Bernt Aarli<sup>7,8</sup>,  
Håvard Dalen<sup>2,9,10</sup>, Bjarne Martens Nes<sup>2</sup>, Tøri Vigeland Lerum<sup>11,12</sup>, Gunnar Einvik<sup>4,12</sup>,  
Knut Stavem<sup>1b 4,12,13</sup> and Ingunn Skjorten<sup>1,14</sup>

<sup>1</sup>LHL Hospital Gardermoen, Jessheim, Norway. <sup>2</sup>Department of Circulation and Medical Imaging, Norwegian University of Science and Technology, Trondheim, Norway. <sup>3</sup>Faculty of Nursing and Health Sciences, Nord University, Bodø, Norway. <sup>4</sup>Pulmonary Department, Akershus University Hospital, Lørenskog, Norway. <sup>5</sup>Department of Clinical and Molecular Medicine, Norwegian University of Science and Technology, Trondheim, Norway. <sup>6</sup>Thoracic Department, St Olavs Hospital, Trondheim, Norway. <sup>7</sup>Department of Clinical Science, University of Bergen, Bergen, Norway. <sup>8</sup>Department of Thoracic Medicine, Haukeland University Hospital, Bergen, Norway. <sup>9</sup>Clinic of Cardiology, St Olavs University Hospital, Trondheim, Norway. <sup>10</sup>Department of Medicine, Levanger Hospital, Nord-Trøndelag Hospital Trust, Levanger, Norway. <sup>11</sup>Department of Pulmonary Medicine, Oslo University Hospital Ullevål, Oslo, Norway. <sup>12</sup>Institute for Clinical Medicine, University of Oslo, Oslo, Norway. <sup>13</sup>Health Services Research Unit, Akershus University Hospital, Lørenskog, Norway. <sup>14</sup>Department of Pulmonary Medicine, Oslo University Hospital Rikshospitalet, Oslo, Norway.

Corresponding author: Charlotte Björk Ingul ([charlotte.b.ingul@ntnu.no](mailto:charlotte.b.ingul@ntnu.no))

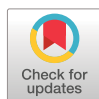

Shareable abstract (@ERSpublications)

**Exercise capacity improves in COVID-19 patients from 3 to 12 months after hospitalisation, and the majority have normal exercise capacity (77%). Circulatory limitations are more common than ventilatory limitation after COVID-19. Deconditioning is common.** <https://bit.ly/3DIPxcG>

**Cite this article as:** Ingul CB, Edvardsen A, Follestad T, *et al.* Changes in cardiopulmonary exercise capacity and limitations 3–12 months after COVID-19. *Eur Respir J* 2023; 61: 2200745 [DOI: 10.1183/13993003.00745-2022].

This single-page version can be shared freely online.

Copyright ©The authors 2023.

This version is distributed under the terms of the Creative Commons Attribution Non-Commercial Licence 4.0. For commercial reproduction rights and permissions contact [permissions@ersnet.org](mailto:permissions@ersnet.org)

This article has an editorial commentary:  
<https://doi.org/10.1183/13993003.01739-2022>

Received: 8 April 2022  
Accepted: 27 Aug 2022

## Abstract

**Rationale** To describe cardiopulmonary function during exercise 12 months after hospital discharge for coronavirus disease 2019 (COVID-19), assess the change from 3 to 12 months, and compare the results with matched controls without COVID-19.

**Methods** In this prospective, longitudinal, multicentre cohort study, hospitalised COVID-19 patients were examined using a cardiopulmonary exercise test (CPET) 3 and 12 months after discharge. At 3 months, 180 performed a successful CPET, and 177 did so at 12 months (mean age 59.3 years, 85 females). The COVID-19 patients were compared with controls without COVID-19 matched for age, sex, body mass index and comorbidity. Main outcome was peak oxygen uptake ( $V_{O_{2peak}}$ ).

**Results** Exercise intolerance ( $V_{O_{2peak}} < 80\%$  predicted) was observed in 23% of patients at 12 months, related to circulatory (28%), ventilatory (17%) and other limitations including deconditioning and dysfunctional breathing (55%). Estimated mean difference between 3 and 12 months showed significant increases in  $V_{O_{2peak}} \%$  pred (5.0 percentage points (pp), 95% CI 3.1–6.9 pp;  $p < 0.001$ ),  $V_{O_{2peak}} \cdot \text{kg}^{-1} \%$  pred (3.4 pp, 95% CI 1.6–5.1 pp;  $p < 0.001$ ) and oxygen pulse  $\%$  pred (4.6 pp, 95% CI 2.5–6.8 pp;  $p < 0.001$ ).  $V_{O_{2peak}}$  was  $2440 \text{ mL} \cdot \text{min}^{-1}$  in COVID-19 patients compared to  $2972 \text{ mL} \cdot \text{min}^{-1}$  in matched controls.

**Conclusions** 1 year after hospital discharge for COVID-19, the majority (77%), had normal exercise capacity. Only every fourth had exercise intolerance and in these circulatory limiting factors were more common than ventilator factors. Deconditioning was common.  $V_{O_{2peak}}$  and oxygen pulse improved significantly from 3 months.

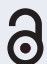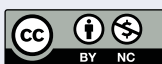

Supplement: inline-supplementary-material-2 [file inline-supplementary-material-2.pdf]
