# Supplementary material
Source: HighWire-hosted journal article supplement (https://erj.ersjournals.com/content/61/2/2200745)
Supplement: inline-supplementary-material-1 [file inline-supplementary-material-1.pdf]

**Supplementary Table S1:** Descriptive statistics for all COVID-19 patients at 12 months with a valid CPET at either 3 or 12 months after hospitalization (n=210) and subgroups of the patients with and without dyspnoea at 3 months.

|                                                            | All patients (n=210)   | Dyspnoea (n=85)        | No dyspnoea (n=87)     |
|------------------------------------------------------------|------------------------|------------------------|------------------------|
|                                                            | Number (%) / Mean (SD) | Number (%) / Mean (SD) | Number (%) / Mean (SD) |
| Age at hospital discharge, years                           | 210 / 58.1 (13.8)      | 57.7(13.3)             | 56.8(14.0)             |
| Female sex                                                 | 85 (41%)               | 42(49)                 |                        |
| Body mass index, kg·m <sup>2</sup> ,<br>3 months/12 months | 28.0 (4.4)%/28.5 (4.8) | 29.1(4.6)/30.2(5.5)    | 27.2(3.9)/27.6(3.9)    |
| <u>Smoking status (n=176)</u>                              |                        |                        |                        |
| Never smoked                                               | 113 (64)               | 45(54)                 | 55(64)                 |
| Formerly a daily smoker                                    | 78 (44)                | 35(42)                 | 31(36)                 |
| Current daily smoker                                       | 5 (3)                  | 4(5)                   | 0(0)                   |
| <u>Medical history (n=208)</u>                             |                        |                        |                        |
| Myocardial infarction                                      | 14 (7)                 | 8(10)                  | 4(5)                   |
| Heart failure                                              | 8 (4)                  | 6(7)                   | 2(2)                   |
| CVA/TIA                                                    | 3 (1)                  | 2(2)                   | 1(1)                   |
| Hypertension (n=203)                                       | 66 (32)                | 27(33)                 | 25(29)                 |
| COPD                                                       | 7 (3)                  | 3(4)                   | 1(1)                   |
| Asthma                                                     | 39 (18)                | 19(23)                 | 9(10)                  |
| Diabetes mellitus                                          | 16 (8)                 | 8(10)                  | 7(8)                   |
| <u>Spirometry and body plethysmography</u>                 |                        |                        |                        |
| FEV <sub>1</sub> % predicted, 12 months (n=189)            | 94 (15)                | 94(13)                 | 95(14)                 |
| FVC % predicted, 12 months (n=187)                         | 97 (13)                | 96(13)                 | 96(16)                 |
| TLC, % predicted, 12 months (n=156)                        | 97 (17)                | 97(15)                 | 96(15)                 |
| <u>Gas diffusion</u>                                       |                        |                        |                        |
| D <sub>LCO</sub> % predicted, 12 months (n=184)            | 92 (17)                | 92(15)                 | 96(16)                 |
| <u>modified MRC dyspnoea scale 3 months/12 months (</u>    | 176/183                |                        |                        |
| 0                                                          | 87 (49.4%)/97 (53.0)   |                        |                        |
| 1-4                                                        | 89 (50.6%)/86(47.0)    |                        |                        |
| <i>Advanced oxygen treatment</i>                           | 58                     | 28                     | 25                     |
| High flow nasal oxygen                                     | 3(2)                   | 3(4)                   | 0(0)                   |
| CPAP                                                       | 15(8)                  | 7(8)                   | 7(8)                   |
| BiPAP                                                      | 14(7)                  | 7(9)                   | 7(8)                   |
| Mechanical ventilation with intubation                     | 26(13)                 | 11(13)                 | 11(13)                 |
| <i>WHO Ordinal Scale for Clinical Improvement</i>          | 208                    |                        |                        |
| 3                                                          | 75 (36)                | 25(29)                 | 34(40)                 |
| 4                                                          | 96 (46)                | 43(51)                 | 39(45)                 |
| 5-7                                                        | 37 (18)                | 17(20)                 | 13(15)                 |

The number of patients represents all patients that had at least one valid CPET at either 3 or 12 months. \* Maximum values during hospitalization. CVA: cerebral vascular accident; TIA: transient ischemic attack; PFT: pulmonary function test; FVC: forced vital capacity; FEV<sub>1</sub>: forced expiratory volume in one second; TLC: total lung capacity; D<sub>LCO</sub>: diffusion capacity of

the lung for carbon monoxide; V<sub>A</sub>: alveolar volume; MRC: Medical Research Council; CPAP: Continuous Positive Airway Pressure, BiPAP: Bi-level Positive Airway Pressure, WHO: World Health Organization

| <b>Supplementary Table S2.</b> Estimated effect of the interaction between the categorical time variable (3 or 12 months) and obesity or comorbidity on the outcome variables, given as the difference in change from 3 to 12 months between obese and non-obese (n=204), and between comorbidity and no-comorbidity (n=208). |                          |       |                       |       |
|-------------------------------------------------------------------------------------------------------------------------------------------------------------------------------------------------------------------------------------------------------------------------------------------------------------------------------|--------------------------|-------|-----------------------|-------|
|                                                                                                                                                                                                                                                                                                                               | Time by obesity (BMI>30) |       | Time by comorbidity   |       |
|                                                                                                                                                                                                                                                                                                                               | Estimate (95% CI)        | p     | Estimate (95% CI)     | p     |
| <i><u>Performance</u></i>                                                                                                                                                                                                                                                                                                     |                          |       |                       |       |
| V' <sub>O<sub>2</sub>peak</sub> , mL·min <sup>-1</sup>                                                                                                                                                                                                                                                                        | -110 (-270 to 42)        | 0.150 | -110 (-237 to 12)     | 0.076 |
| V' <sub>O<sub>2</sub>peak</sub> % of predicted                                                                                                                                                                                                                                                                                | -3.4 (-9.0 to 1.8)       | 0.202 | -4.2 (-9.3 to 0.9)    | 0.098 |
| V' <sub>O<sub>2</sub>peak</sub> ·kg <sup>-1</sup> , mL·kg <sup>-1</sup> ·min <sup>-1</sup>                                                                                                                                                                                                                                    | -1.5 (-3.2 to 0.2)       | 0.077 | -0.7 (-2.5 to 1.0)    | 0.372 |
| V' <sub>O<sub>2</sub>peak</sub> ·kg <sup>-1</sup> , % of predicted                                                                                                                                                                                                                                                            | -4.3 (-9.2 to 0.5)       | 0.083 | -2 (-7.7 to 3.5)      | 0.452 |
| Perceived dyspnoea Borg <sub>10</sub> at max load                                                                                                                                                                                                                                                                             | 0.7 (-0.1 to 1.6)        | 0.110 | 0.8 (-0.6 to 2.0)     | 0.230 |
| <i><u>Ventilation</u></i>                                                                                                                                                                                                                                                                                                     |                          |       |                       |       |
| V' <sub>E</sub> at max. load, L·min <sup>-1</sup>                                                                                                                                                                                                                                                                             | -2.4 (-9.5 to 4.7)       | 0.482 | 2.2 (-7.7 to 12.0)    | 0.672 |
| Breathing reserve, %                                                                                                                                                                                                                                                                                                          | 0.3 (-6.5 to 7.5)        | 0.894 | -0.7 (-12.6 to 11.7)  | 0.910 |
| <i><u>Circulation</u></i>                                                                                                                                                                                                                                                                                                     |                          |       |                       |       |
| Heart rate at max.load, beats·min <sup>-1</sup>                                                                                                                                                                                                                                                                               | -5.3 (-11.3 to 0.5)      | 0.074 | -0.2 (-8.0 to 7.8)    | 0.927 |
| Heart rate at max. load, % of predicted                                                                                                                                                                                                                                                                                       | -3.1 (-6.6 to 0.3)       | 0.070 | 0.0 (-4.9 to 5.1)     | 0.976 |
| Systolic BP at max. load, mmHg                                                                                                                                                                                                                                                                                                | -10.7 (-26.7 to 6.0)     | 0.215 | -9.4 (-35.2 to 15.0)  | 0.430 |
| Diastolic BP at max. load, mmHg                                                                                                                                                                                                                                                                                               | -10.8 (-18.4 to -2.9)    | 0.006 | -4.7 (-16.0 to 6.2)   | 0.382 |
| Oxygen pulse at max. load, mL·stroke <sup>-1</sup>                                                                                                                                                                                                                                                                            | -0.3 (-1.0 to 0.5)       | 0.446 | -0.8 (-1.9 to 0.2)    | 0.112 |
| Oxygen pulse at max. load, % of predicted                                                                                                                                                                                                                                                                                     | -0.3 (-5.1 to 4.4)       | 0.864 | -3.3 (-11.0 to 3.9)   | 0.357 |
| <i><u>Gas exchange</u></i>                                                                                                                                                                                                                                                                                                    |                          |       |                       |       |
| V' <sub>E</sub> /V' <sub>CO<sub>2</sub></sub> slope                                                                                                                                                                                                                                                                           | -0.5 (-2.2 to 1.3)       | 0.550 | -2.6 (-6.5 to 0.8)    | 0.145 |
| V' <sub>E</sub> /V' <sub>CO<sub>2</sub>nadir</sub>                                                                                                                                                                                                                                                                            | 0.2 (-0.8 to 1.3)        | 0.717 | 0.8 (-0.9 to 2.6)     | 0.365 |
| RER at max. load                                                                                                                                                                                                                                                                                                              | 0.01 (-0.02 to 0.05)     | 0.474 | 0.03 (-0.01 to 0.09)  | 0.180 |
| P <sub>ETCO<sub>2</sub></sub> at AT, kPa                                                                                                                                                                                                                                                                                      | 0.11 (-0.11 to 0.36)     | 0.368 | -0.24 (-0.58 to 0.08) | 0.152 |
| P <sub>CO<sub>2</sub></sub> at max. load, kPa                                                                                                                                                                                                                                                                                 | 0.1 (-0.2 to 0.3)        | 0.522 | 0.1 (-0.3 to 0.5)     | 0.662 |
| <i><u>Anaerobic threshold</u></i>                                                                                                                                                                                                                                                                                             |                          |       |                       |       |
| V' <sub>O<sub>2</sub></sub> at AT, mL·min <sup>-1</sup> (V-slope)                                                                                                                                                                                                                                                             | 28 (-76 to 137)          | 0.596 | 40 (-110 to 201)      | 0.616 |
| V' <sub>O<sub>2</sub>peak</sub> at AT, % of predicted V' <sub>O<sub>2</sub>max</sub>                                                                                                                                                                                                                                          | 1.0 (-3.0 to 5.4)        | 0.636 | 1.4 (-5.7 to 9.0)     | 0.713 |
| Lactate at max. load, mmol·L <sup>-1</sup>                                                                                                                                                                                                                                                                                    | 0.1 (-1.0 to 1.2)        | 0.824 | 0.1 (-1.4 to 1.6)     | 0.900 |

Estimates are from linear mixed models including main effects and interactions with time for ICU stay and dyspnoea, age, sex, obesity and comorbidity at 3 months. 95% CIs and p-values are found by bootstrapping.

| <b>Supplementary Table S3.</b> Estimated effect of the interaction between the categorical time variable (3 or 12 months) and obesity or comorbidity on the outcome variables, given as the difference slope for age at 12 months vs 3 months (n=210), and in change from 3 to 12 between males and females (n=210). |                   |       |                   |       |
|----------------------------------------------------------------------------------------------------------------------------------------------------------------------------------------------------------------------------------------------------------------------------------------------------------------------|-------------------|-------|-------------------|-------|
|                                                                                                                                                                                                                                                                                                                      | Time by age       |       | Time by sex       |       |
|                                                                                                                                                                                                                                                                                                                      | Estimate (95% CI) | p     | Estimate (95% CI) | p     |
| <i><u>Performance</u></i>                                                                                                                                                                                                                                                                                            |                   |       |                   |       |
| V' <sub>O<sub>2</sub>peak</sub> , mL·min <sup>-1</sup>                                                                                                                                                                                                                                                               | 11 (-27 to 52)    | 0.525 | -70 (-183 to 31)  | 0.190 |

|                                                                    |                       |       |                       |       |
|--------------------------------------------------------------------|-----------------------|-------|-----------------------|-------|
| $V'_{O_{2peak}}$ , % of predicted                                  | 0.6 (-0.9 to 2.1)     | 0.387 | -3.7 (-8 to 0.1)      | 0.058 |
| $V'_{O_{2peak}} \cdot kg^{-1}$ , mL $\cdot kg^{-1} \cdot min^{-1}$ | 0.1 (-0.3 to 0.6)     | 0.516 | -1.4 (-2.9 to -0.1)   | 0.029 |
| $V'_{O_{2peak}} \cdot kg^{-1}$ , % of predicted                    | 0.6 (-0.9 to 2.0)     | 0.390 | -4.1 (-8.5 to -0.3)   | 0.038 |
| Perceived dyspnoea Borg <sub>10</sub> at max load                  | -0.1 (-0.4 to 0.2)    | 0.411 | -0.3 (-1.0 to 0.3)    | 0.300 |
| <u>Ventilation</u>                                                 |                       |       |                       |       |
| $V'_E$ at max. load, L $\cdot min^{-1}$                            | -2.2 (-5.3 to 0.7)    | 0.148 | 2.1 (-4.5 to 8.9)     | 0.521 |
| Breathing reserve, %                                               | 0.2 (-2.6 to 3.1)     | 0.939 | -2.6 (-9.3 to 4.4)    | 0.461 |
| <u>Circulation</u>                                                 |                       |       |                       |       |
| Heart rate at max.load, beats $\cdot min^{-1}$                     | -1.1 (-3.4 to 1.1)    | 0.321 | -3.0 (-8.7 to 2.4)    | 0.294 |
| Heart rate at max. load, % of predicted                            | -0.6 (-2.0 to 0.6)    | 0.319 | -1.8 (-5.2 to 1.4)    | 0.273 |
| Systolic BP at max. load, mmHg                                     | 0.0 (-5.9 to 6.3)     | 0.970 | -15.5 (-31.3 to 0.5)  | 0.054 |
| Diastolic BP at max. load, mmHg                                    | 0.5 (-2.3 to 3.5)     | 0.683 | -4.1 (-11.0 to 3.1)   | 0.244 |
| Oxygen pulse at max. load, mL $\cdot stroke^{-1}$                  | 0.3 (0.0 to 0.5)      | 0.049 | -0.2 (-0.9 to 0.5)    | 0.512 |
| Oxygen pulse at max. load, % of predicted                          | 1.2 (-0.5 to 3.1)     | 0.173 | -2.9 (-7.5 to 1.8)    | 0.214 |
| <u>Gas exchange</u>                                                |                       |       |                       |       |
| $V'_E/V'_{CO_2}$ slope                                             | -0.5 (-1.1 to 0.0)    | 0.075 | 1.5 (0.1 to 3.0)      | 0.040 |
| $V'_E/V'_{CO_{2nadir}}$                                            | -0.1 (-0.5 to 0.2)    | 0.393 | 0.8 (-0.1 to 1.7)     | 0.071 |
| RER at max. load                                                   | -0.01 (-0.03 to 0.00) | 0.088 | -0.02 (-0.06 to 0.02) | 0.289 |
| $P_{ETCO_2}$ at AT, kPa                                            | -0.01 (-0.07 to 0.07) | 0.828 | -0.12 (-0.29 to 0.06) | 0.171 |
| $P_{CO_2}$ at max. load, kPa                                       | -0.1 (-0.2 to 0.0)    | 0.163 | 0.0 (-0.2 to 0.2)     | 0.900 |
| <u>Anaerobic threshold</u>                                         |                       |       |                       |       |
| $V'_{O_2}$ at AT, mL $\cdot min^{-1}$ (V-slope)                    | -9 (-50 to 33)        | 0.674 | -32 (-134 to 70)      | 0.544 |
| $V'_{O_{2peak}}$ at AT, % of predicted $V'_{O_{2max}}$             | 0.0 (-1.5 to 1.5)     | 0.986 | -2.5 (-6.6 to 1.9)    | 0.238 |
| Lactate at max. load, mmol $\cdot L^{-1}$                          | 0.0 (-0.4 to 0.3)     | 0.828 | 1.4 (0.4 to 2.3)      | 0.002 |

Estimates are from linear mixed models including main effects and interactions with time for ICU stay and dyspnoea, age, sex, obesity, and comorbidity at 3 months. 95% CIs and p-values are found by bootstrapping.

| <b>Supplementary Table S4. RER at max. load greater or less than 1.1 with the estimate of difference between patients and controls at 12 months</b> |          |                        |                |                        |                |                        |                |
|-----------------------------------------------------------------------------------------------------------------------------------------------------|----------|------------------------|----------------|------------------------|----------------|------------------------|----------------|
|                                                                                                                                                     |          | <b>RER &lt; 1.1</b>    |                | <b>RER ≥ 1.1</b>       |                | <b>Interaction</b>     |                |
|                                                                                                                                                     | <b>n</b> | <b>Estimate 95% CI</b> | <b>p-value</b> | <b>Estimate 95% CI</b> | <b>p-value</b> | <b>Estimate 95% CI</b> | <b>p-value</b> |
| <u>Performance</u>                                                                                                                                  |          |                        |                |                        |                |                        |                |
| $V'_{O_{2peak}}$ , mL $\cdot min^{-1}$                                                                                                              | 380      | -488 (-642 to -335)    | <0.001         | -553 (-695 to -371)    | <0.001         | -45 (-269 to 179)      | 0.693          |
| $V'_{O_{2peak}} \cdot kg^{-1}$ , mL $\cdot kg^{-1} \cdot min^{-1}$                                                                                  | 380      | -6.1 (-7.7 to -4.4)    | <0.001         | -6.4 (-8.2 to -4.7)    | <0.001         | -0.4 (-2.8 to 2.1)     | 0.764          |
| Perceived dyspnoea Borg <sub>10</sub> at max. load *                                                                                                | 374      | 0 (-0.5 to 0.5)        | 0.944          | -0.7 (-1.2 to -0.1)    | 0.017          | -0.7 (-1.5 to 0.1)     | 0.075          |
| <u>Ventilation</u>                                                                                                                                  |          |                        |                |                        |                |                        |                |
| $V'_E$ at max. load, L $\cdot min^{-1}$                                                                                                             | 380      | -15.8 (-21.2 to -10.3) | <0.001         | -13.0 (-18.7 to -7.2)  | <0.001         | 2.8 (-5.2 to 10.8)     | 0.489          |
| Breathing frequency at max. load, min <sup>-1</sup>                                                                                                 | 380      | -4.6 (-6.7 to -2.6)    | <0.001         | -4.0 (-6.2 to -1.8)    | <0.001         | 0.7 (-2.4 to 3.7)      | 0.667          |
| <u>Circulation</u>                                                                                                                                  |          |                        |                |                        |                |                        |                |
| Heart rate at max.load, beats $\cdot min^{-1}$                                                                                                      | 378      | -19.4 (-23.8 to -15.0) | <0.001         | -11.3 (-15.9 to -6.6)  | <0.001         | 8.1 (1.7 to 14.5)      | 0.013          |

Estimated difference between patients and controls in each of the subgroups RER <1.1 and RER ≥ 1.1, and :

Interaction: the difference in differences (Interaction; difference RER ≥ 1.1 - difference RER <1.1), adjusted for age, sex, BMI, systolic blood pressure, chronic obstructive pulmonary disease, diabetes, myocardial infarction, and congestive heart failure. CI: Confidence interval.  $V'_{O_2}$ : oxygen uptake;  $V'_E$ : expired ventilation; RER: respiratory exchange ratio
